# Supplementary material for: Free Phenolic Compounds, Antioxidant Capacity and FT-NIR Survey of Debittered Lupinus mutabilis Seeds
Source: MDPI journal article supplement (doi:10.3390/pr10081637), 2022-08-18
Supplement: s1 [file s1]

## Supplementary Materials

# Free Phenolic Compounds, Antioxidant Capacity and FT-NIR Survey of Debittered *Lupinus mutabilis* Seeds

Lorenzo Estivi <sup>1</sup>, Silvia Grassi <sup>1</sup>, Luis Briceño-Berrú <sup>2</sup>, Patricia Glorio-Paulet <sup>2,3</sup>, Felix Camarena <sup>4</sup>, Alyssa Hidalgo <sup>1,\*</sup> and Andrea Brandolini <sup>5</sup>

- <sup>1</sup> Department of Food, Environmental and Nutritional Sciences (DeFENS), Università degli Studi di Milano, Via Celoria 2, 20133 Milan, Italy
  - <sup>2</sup> Departamento de Ingeniería de Alimentos y Productos Agropecuarios (DIAPA-FIAL), Facultad de Industrias Alimentarias, Universidad Nacional Agraria La Molina, Av. La Molina s/n, Lima 15024, Peru
  - <sup>3</sup> Instituto de Investigación de Bioquímica y Biología Molecular (IIBBM), Universidad Nacional Agraria La Molina (UNALM), Av. La Molina s/n, Lima 15024, Peru
  - <sup>4</sup> Programa de Leguminosas, Facultad de Agronomía, Universidad Nacional Agraria La Molina (UNALM), Av. La Molina s/n, Lima 15024, Peru
  - <sup>5</sup> Consiglio per la Ricerca in Agricoltura e l'analisi dell'economia Agraria-Unità di Ricerca per la Zootecnia e l'Acquacoltura (CREA-ZA), via Piacenza 29, 26900 Lodi, Italy
- \* Correspondence: alyssa.hidalgoval@unimi.it; Tel.: +39-02-5031-9189

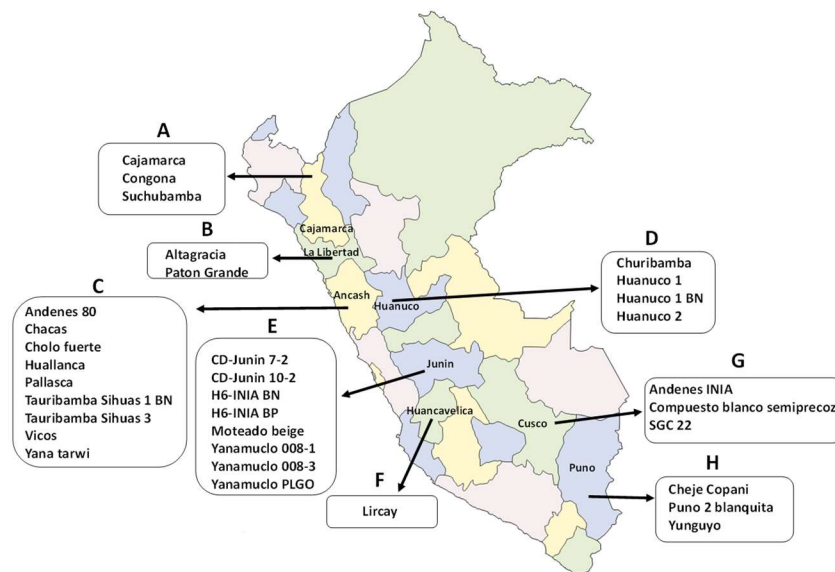

Figure S1. Areas of origin of the 33 *Lupinus mutabilis* ecotypes analysed.

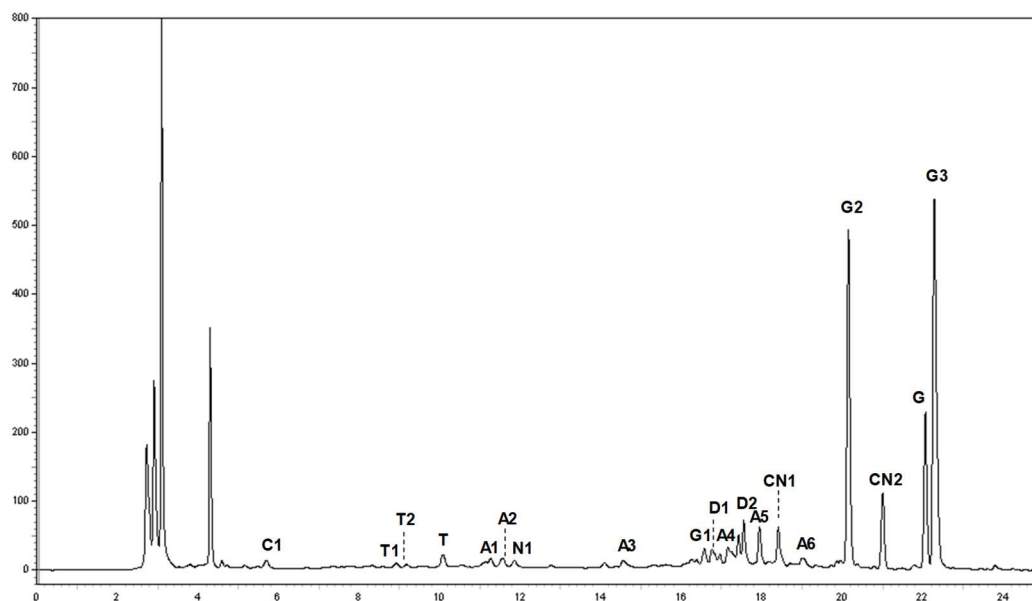

**Figure S2.** HPLC chromatogram at 280 nm of the free phenolics in one *Lupinus mutabilis* ecotype. A1-A6, apigenin derivatives; C1, catechin derivative; CN1-CN2, cinammic acid derivatives; D1-D2, diosmin derivatives; G, genistein; G1-G3, genistein derivatives; N1, naringenin derivative; T, tyrosol; T1-T2, tyrosol derivative. Apigenin derivatives are read at 320 nm while diosmin derivatives at 360 nm.

**Table S1.** *Lupinus mutabilis* ecotypes and other *Lupinus* species tested, and their area of origin (see also Figure S1).

|                             | Code    | Department   | Area |
|-----------------------------|---------|--------------|------|
| <i>Lupinus mutabilis</i>    |         |              |      |
| Cajamarca                   | CAJ     | Cajamarca    | A    |
| Congona                     | CON     | Cajamarca    | A    |
| Suchubamba                  | SUC     | Cajamarca    | A    |
| Altagracia                  | ALG     | La Libertad  | B    |
| Paton grande                | PAG     | La Libertad  | B    |
| Andenes 80                  | AND80   | Ancash       | C    |
| Chacas                      | CHA     | Ancash       | C    |
| Cholo fuerte                | CHF     | Ancash       | C    |
| Huallanca                   | HUAL    | Ancash       | C    |
| Pallasca                    | PAL     | Ancash       | C    |
| Tauribamba Sihuas 1 BN      | TS1BN   | Ancash       | C    |
| Tauribamba Sihuas 3 N       | TS3N    | Ancash       | C    |
| Vicos                       | VIC     | Ancash       | C    |
| Yana Tarwi                  | YAT     | Ancash       | C    |
| Churibamba                  | CHU     | Huánuco      | D    |
| Huanuco 1 BN                | HU1BN   | Huánuco      | D    |
| Huanuco 1                   | HU1     | Huánuco      | D    |
| Huanuco 2                   | HU2     | Huánuco      | D    |
| CD Junin 7-2                | CDJ7-2  | Junín        | E    |
| CD Junin 10-2               | CDJ10-2 | Junín        | E    |
| H6 INIA BN                  | H6BN    | Junín        | E    |
| H6 INIA BP                  | H6BP    | Junín        | E    |
| Moteado beige               | MOB     | Junín        | E    |
| Yanamuclo 008-1             | YA1     | Junín        | E    |
| Yanamuclo 008-3             | YA3     | Junín        | E    |
| Yanamuclo PLGO              | YAPL    | Junín        | E    |
| Lircay                      | LIR     | Huancavelica | F    |
| Andenes INIA                | ANDIN   | Cusco        | G    |
| Compuesto blanco semiprecoz | CBSP    | Cusco        | G    |
| SGC 22                      | SGC22   | Cusco        | G    |
| Cheje Copani                | CHC     | Puno         | H    |
| Puno 2 blanquita            | PU2B    | Puno         | H    |
| Yunguyo                     | YUN     | Puno         | H    |

|                                    |                |       |
|------------------------------------|----------------|-------|
| <i>Controls</i>                    |                |       |
| <i>L. albus</i> - Dulce 7          | <i>albus</i> D | Junín |
| <i>L. albus</i> - Ares             | <i>albus</i> A | Italy |
| <i>L. albus</i> - Multitalia       | <i>albus</i> M | Italy |
| <i>L. angustifolius</i> - Boregine | <i>angust</i>  | Italy |
| <i>L. luteus</i> - Percoz          | <i>luteus</i>  | Italy |

**Table S2.** Free phenolics content (mean±sd; mg/kg DM) in debittered seeds of *Lupinus* ecotypes.

|                                    | Genistein  | Genistein<br>der | Apigenin<br>der* | Catechin<br>der | Diosmin<br>der | Naringeni<br>n der | Tyrosol  | Tyrosol<br>der | Cinnamic<br>acid der |
|------------------------------------|------------|------------------|------------------|-----------------|----------------|--------------------|----------|----------------|----------------------|
| <i>Lupinus mutabilis</i>           |            |                  |                  |                 |                |                    |          |                |                      |
| Cajamarca                          | 135.0±8.3  | 497.8±36.6       | 20.1±3.1         | 4.5±0.9         | 84.4±13.3      | 2.8±0.2            | 19.4±3.4 | nd             | 1.7±0.0              |
| Congona                            | 56.2±3.6   | 279.2±5.3        | 3.9±0.0          | nd              | 43.0±1.7       | 2.6±0.0            | nd       | 60.3±0.1       | 5.8±0.1              |
| Suchubamba                         | 72.3±0.7   | 274.2±9.9        | 9.2±0.2          | nd              | 138.2±5.9      | 6.9±0.0            | nd       | 44.9±0.7       | 5.0±0.1              |
| Altagracia                         | 166.8±2.9  | 456.2±4.7        | 21.6±0.7         | nd              | 69.5±9.2       | 7.2±0.1            | 13.8±0.1 | 24.5±0.7       | 1.0±0.1              |
| Paton grande                       | 101.5±1.6  | 430.7±8.1        | 15.1±0.1         | 14.7±0.9        | 44.0±0.8       | 4.1±0.3            | 11.9±0.1 | 3.6±0.2        | nd                   |
| Andenes 80                         | 203.0±33.1 | 527.0±97.2       | 28.0±3.3         | nd              | 71.9±7.0       | 11.2±0.2           | 25.6±4.6 | 46.9±2.1       | 2.6±0.1              |
| Chacas                             | 314.4±6.7  | 946.8±13.3       | 3.3±0.1          | nd              | 7.2±0.3        | 8.0±0.4            | nd       | 51.9±0.3       | 10.9±0.1             |
| Cholo fuerte                       | 93.3±3.6   | 316.1±4.5        | 11.9±1.1         | 6.5±0.6         | 70.3±6.1       | 7.6±0.2            | 13.4±3.8 | 11.8±1.3       | 1.3±0.0              |
| Huallanca                          | 118.7±11.5 | 409.7±35.5       | 17.4±0.3         | 7.1±0.4         | 95.0±5.8       | 3.0±0.4            | nd       | nd             | 2.5±0.1              |
| Pallasca                           | 50.6±2.1   | 356.9±0.4        | 5.0±0.1          | nd              | 42.5±0.8       | 9.5±0.0            | nd       | 26.8±0.6       | 6.6±0.2              |
| Tauribamba Sihuas 1 BN             | 167.4±6.5  | 401.7±5.5        | 2.7±0.0          | nd              | 25.0±0.0       | 7.4±0.2            | nd       | 43.8±0.8       | 7.9±0.1              |
| Tauribamba Sihuas 3 N              | 160.9±0.3  | 502.0±19.7       | 3.0±0.0          | nd              | 16.6±0.5       | 5.2±0.1            | nd       | 27.0±0.9       | 5.4±0.0              |
| Vicos                              | 86.9±1.8   | 296.2±11.6       | 4.4±0.1          | nd              | 8.8±0.5        | 11.6±0.3           | nd       | 45.0±0.1       | 11.1±0.1             |
| Yana Tarwi                         | 68.1±1.8   | 376.8±12.5       | 5.9±0.1          | nd              | 62.3±4.5       | 5.0±0.1            | nd       | 59.0±0.4       | 10.3±0.1             |
| Churibamba                         | 39.6±0.9   | 219.6±3.8        | 6.5±0.3          | nd              | 25.4±0.7       | 3.8±0.2            | nd       | 45.8±0.9       | nd                   |
| Huanuco 1 BN                       | 352.1±4.0  | 430.8±5.0        | 23.9±0.6         | 5.5±0.2         | 168.2±17.6     | 8.2±0.1            | 8.6±0.6  | nd             | 1.7±0.3              |
| Huanuco 1                          | 96.2±0.9   | 383.5±7.7        | 7.0±0.2          | nd              | 130.3±1.2      | 3.1±0.1            | nd       | 44.7±0.5       | nd                   |
| Huanuco 2                          | 334.6±14.3 | 762.3±32.0       | 17.2±2.1         | 8.8±1.6         | 99.5±10.2      | 4.0±0.3            | 29.1±0.4 | 4.7±0.9        | nd                   |
| CD Junin 7-2                       | 38.0±2.1   | 257.6±4.0        | 3.2±0.1          | nd              | 68.4±0.5       | 3.7±0.0            | nd       | 37.4±0.3       | 11.6±0.1             |
| CD Junin 10-2                      | 57.3±5.0   | 557.3±0.1        | 7.3±0.3          | nd              | 30.2±0.8       | 3.4±0.2            | nd       | 16.0±0.1       | nd                   |
| H6 INIA BN                         | 110.0±11.3 | 483.0±37.6       | 15.2±0.6         | 11.2±0.2        | 55.8±5.2       | 5.2±0.4            | 9.4±0.5  | 6.3±1.6        | 2.1±0.1              |
| H6 INIA BP                         | 196.4±0.5  | 1062.8±24.9      | 22.9±0.2         | 11.8±2.0        | 40.6±1.5       | 5.5±1.2            | 25.3±0.7 | 25.0±3.5       | 2.9±0.6              |
| Moteado beige                      | 225.1±12.0 | 857.6±40.6       | 24.9±2.3         | 19.2±3.3        | 79.3±6.5       | 2.5±0.1            | 29.0±0.9 | 33.3±2.9       | nd                   |
| Yanamuclo 008-1                    | 142.4±5.7  | 438.4±23.7       | 10.9±2.4         | 17.1±2.6        | 67.2±6.6       | 5.1±0.1            | 14.3±1.0 | 11.4±0.9       | 2.5±0.1              |
| Yanamuclo 008-3                    | 110.5±4.0  | 354.8±6.1        | 13.9±0.0         | 16.2±0.4        | 71.2±2.0       | 5.1±0.1            | 16.4±0.5 | 9.1±0.9        | nd                   |
| Yanamuclo PLGO                     | 61.2±1.7   | 314.4±13.0       | 14.7±0.1         | 16.5±0.4        | 78.5±6.9       | 5.2±0.3            | 13.2±0.1 | nd             | 3.7±0.6              |
| Lircay                             | 293.2±14.2 | 780.6±31.3       | 26.5±2.9         | nd              | 64.7±3.3       | 3.9±0.0            | 27.4±0.9 | 23.2±0.9       | 1.7±0.1              |
| Andenes INIA                       | 132.2±2.7  | 480.8±5.7        | 23.2±0.3         | nd              | 72.8±2.6       | 5.5±0.1            | 18.6±2.1 | 19.8±1.5       | nd                   |
| Comp. blanco semiprecoz            | 159.3±21.0 | 616.6±83.8       | 23.8±1.6         | 8.2±0.2         | 58.9±4.4       | 5.2±0.2            | 15.4±1.7 | nd             | 1.9±0.0              |
| SGC 22                             | 91.0±1.1   | 369.4±2.6        | 3.0±0.1          | nd              | 47.0±1.1       | 8.1±0.1            | nd       | 29.6±0.3       | 11.9±0.1             |
| Cheje Copani N                     | 72.4±2.7   | 282.9±5.4        | 3.4±0.0          | nd              | 89.1±2.9       | nd                 | nd       | 36.4±0.5       | nd                   |
| Puno 2 Blanquita                   | 97.8±6.9   | 285.8±10.0       | 17.6±1.8         | 36.5±2.0        | 64.4±4.8       | 4.4±0.3            | 49.2±5.3 | 28.8±1.3       | 1.6±0.1              |
| Yunguyo                            | 76.2±3.1   | 325.2±2.2        | 13.1±0.2         | 17.9±0.4        | 44.6±1.9       | 3.1±0.1            | 32.6±2.7 | 4.7±0.4        | 1.5±0.1              |
|                                    | Genistein  | Genistein<br>der | Apigenin<br>der  | Catechin<br>der | Diosmin<br>der | Naringeni<br>n der | Tyrosol  | Tyrosol<br>der | Cinnamic<br>acid der |
| <i>Controls</i>                    |            |                  |                  |                 |                |                    |          |                |                      |
| <i>L. albus</i> - Dulce 7          | 13.3±3.1   | 4.9±0.8          | 13.1±0.2         | nd              | nd             | nd                 | nd       | nd             | nd                   |
| <i>L. albus</i> - Ares             | nd         | nd               | 6.8±0.3          | nd              | nd             | nd                 | nd       | nd             | nd                   |
| <i>L. albus</i> - Multitalia       | nd         | nd               | 17.3±0.8         | nd              | nd             | nd                 | nd       | nd             | nd                   |
| <i>L. angustifolius</i> - Boregine | nd         | nd               | 14.8±2.1         | nd              | nd             | nd                 | nd       | nd             | nd                   |
| <i>L. luteus</i> - Percoz          | 40.4±5.5   | 230.0±19.3       | 27.8±0.6         | nd              | 98.4±7.7       | 2.0±0.1            | 0.0±0.0  | 49.4±5.8       | 0.0±0.0              |

\*der, derivative. nd, not detected, i.e. below the detection limit.
